# Supplementary material for: High-performance UV-Vis-NIR photomultiplier detectors assisted by interfacial trapped-electrons
Source: Royal Society of Chemistry journal article supplement (doi:10.1039/d3tc02564k), 2023-01-01
Supplement: d3tc02564k1.pdf [file d3tc02564k1.pdf]

## High-performance UV-Vis-NIR photomultiplier detectors assisted by interfacial trapped-electrons

Xiaolong Li, Yulu Tang, Chenyu Wang, Tianzhu Wei, Dongjun Lv, Mingyuan Guo, Yongning Ma and Yuhao Yang\*

\* **Corresponding Authors: Yuhao Yang**, College of Chemistry and Chemical Engineering, Shaanxi University of Science and Technology, Xi'an 710021, China; Shaanxi Key Laboratory of Chemical Additives for Industry, Shaanxi University of Science and Technology, Xi'an 710021, China, E-mail: yangyuhao@sust.edu.cn (Yuhao Yang).

**Yulu Tang, Chenyu Wang, Tianzhu Wei, Yongning Ma:** College of Chemistry and Chemical Engineering, Shaanxi University of Science and Technology, Xi'an 710021, China.

**Mingyuan Guo:** College of Chemistry and Materials Science, Weinan Normal University, Weinan 714099, China

**Dongjun Lv:** Department of Chemical Engineering, School of Chemistry and Chemical Engineering, De Zhou University, Dezhou 253023, China

To determine the optimal mixing ratio of the nanocomposites, we conducted parallel experiments using different proportions (i.e. 1.5:1, 1.25:1, 1:1, 1:1.25 and 1:1.5) as shown in the ESI†, Fig. S1-S4, Table S1-S4. The  $R$  spectra of YZ-PD with different Y-TiOPc: ZnS weight were investigated. As depicted in Fig. S1 and Table S1, the data demonstrates that  $R$  shows the maximum value at wavelengths of 365 nm, 400 nm, 500 nm and 850 nm when Y-TiOPc:ZnS weight ratio is 1:1. The other ratios only have the best performance at 1 or 2 wavelengths, which is relatively less than that of 1:1. Fig. S2 and Table S2 show the  $EQE$  spectra of YZ-PD with different Y-TiOPc: ZnS weight ratios under -18 V bias. The  $EQE$  of Y-TiOPc:ZnS (1:1) show the best performance at four wavelengths (365 nm, 420 nm and 500 nm). It is worth noting that the  $EQE$  values at both 600 nm and 700 nm are very close to the best performance of Y-TiOPc: ZnS (1.5:1). Fig. S3 depicts the noise currents of YZ-PDs with different Y-TiOPc: ZnS weight ratios. As shown in Table S3, the lowest noise current is observed at a 1:1 ratio. Fig. S4 and Table S4 show the YZ-PD with the Y-TiOPc:ZnS weight ratio of 1:1 having the highest  $D^*$  values at all wavelengths. In summary, the YZ-PD with Y-TiOPc: ZnS ratio of 1:1 has the best overall performance from the perspective of  $EQE$ ,  $R$  and  $D^*$ . This specific ratio has thus been identified as the optimal blending proportion of the photoactive layer.

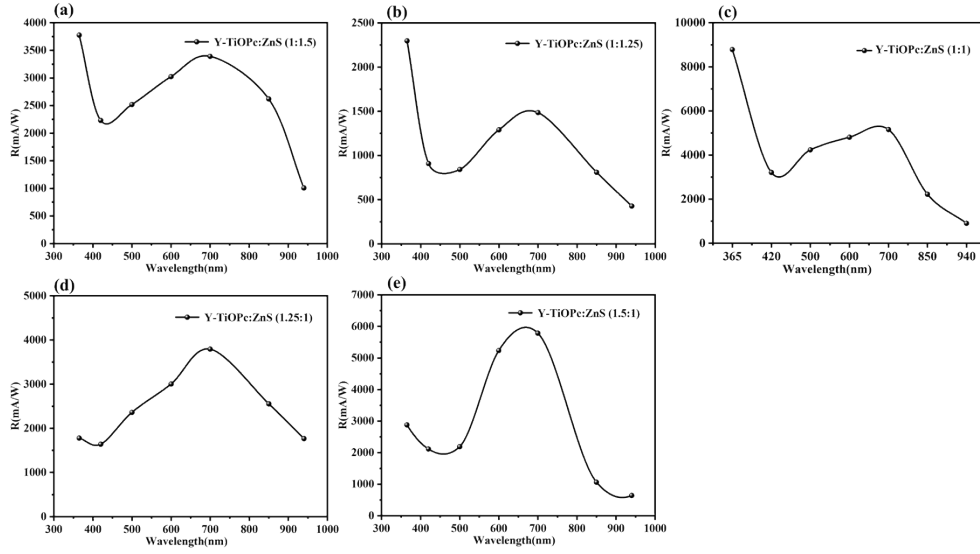

Fig. S1 R spectra of YZ-PD with different Y-TiOPc: ZnS weight ratios under 0.01 mW/cm<sup>2</sup> at -18 V bias, (a) 1:1.5, (b) 1:1.25, (c) 1:1, (d) 1.25:1, (e) 1.5:1

Table S1 R values (mA/W) of YZ-PD with different Y-TiOPc: ZnS weight ratios at -18 V and 0.01 mW/cm<sup>2</sup> (Bold numbers represent the maximum value).

| No.                 | 365 nm      | 420 nm         | 500 nm      | 600 nm      | 700 nm      | 850 nm         | 940 nm      |
|---------------------|-------------|----------------|-------------|-------------|-------------|----------------|-------------|
| Y-TiOPc:ZnS(1:1.5)  | 3776        | 2230           | 2518        | 3022        | 3390        | 2619           | 1007        |
| Y-TiOPc:ZnS(1:1.25) | 2296        | 907            | 841         | 1290        | 1485        | 809            | 427         |
| Y-TiOPc:ZnS(1:1)    | <b>8782</b> | <b>3210.67</b> | <b>4236</b> | 4808        | 5156        | <b>2225.33</b> | 906.67      |
| Y-TiOPc:ZnS(1.25:1) | 1779        | 1639           | 2362        | 3003        | 3793        | 2553           | <b>1777</b> |
| Y-TiOPc:ZnS(1.5:1)  | 2878        | 2114           | 2189        | <b>5237</b> | <b>5786</b> | 1061           | 641         |

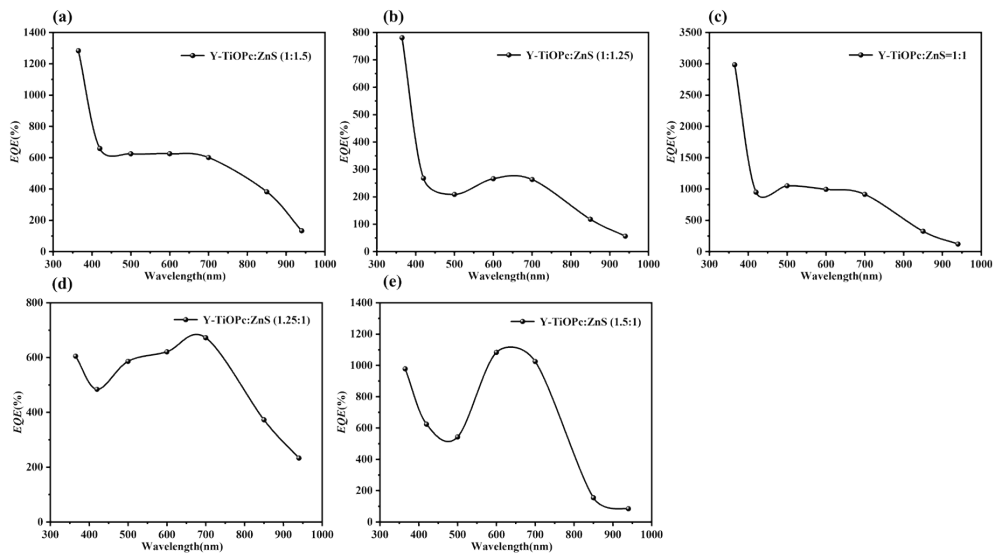

Fig. S2 EQE spectra of YZ-PD with different Y-TiOPc: ZnS weight ratios under 0.01 mW/cm<sup>2</sup> at -18 V bias, (a) 1:1.5, (b) 1:1.25, (c) 1:1, (d) 1.25:1, (e) 1.5:1

Table S2 EQE values (%) of YZ-PD with different Y-TiOPc: ZnS weight ratios at -18 V and 0.01 mW/cm<sup>2</sup> (Bold numbers represent the maximum value).

| No.                     | 365 nm         | 420 nm        | 500 nm         | 600 nm      | 700 nm      | 850 nm     | 940 nm     |
|-------------------------|----------------|---------------|----------------|-------------|-------------|------------|------------|
| Y-TiOPc:ZnS(1:1.5)      | 1284           | 659           | 625            | 625         | 601         | <b>382</b> | 133        |
| Y-TiOPc:ZnS(1:1.25)     | 781            | 268           | 209            | 266         | 263         | 118        | 56         |
| <b>Y-TiOPc:ZnS(1:1)</b> | <b>2985.46</b> | <b>948.54</b> | <b>1051.23</b> | 994.31      | 913.95      | 324.85     | 119.68     |
| Y-TiOPc:ZnS(1.25:1)     | 604            | 484           | 586            | 621         | 672         | 373        | <b>233</b> |
| Y-TiOPc:ZnS(1.5:1)      | 978            | 624           | 543            | <b>1083</b> | <b>1025</b> | 155        | 85         |

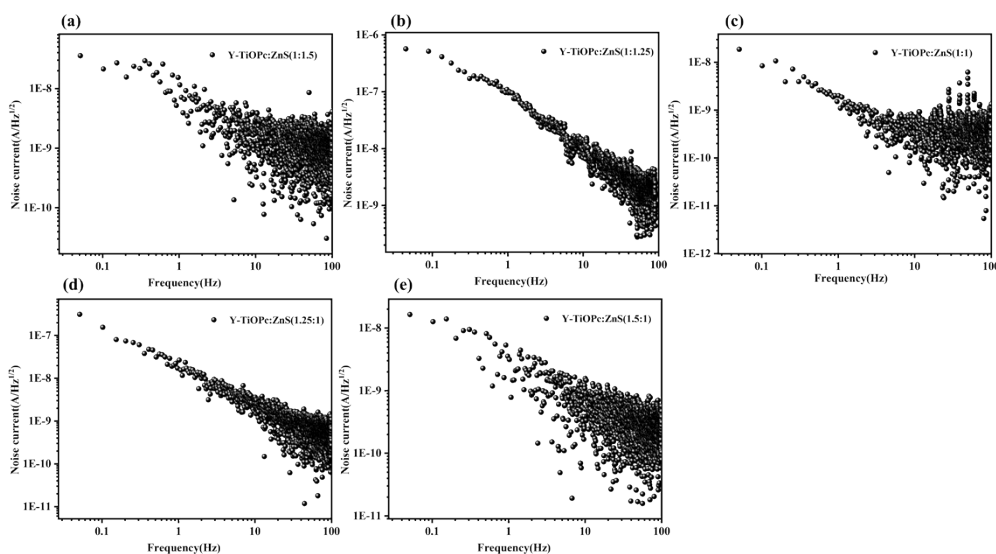

Fig. S3 Noise currents of YZ-PD with different Y-TiOPc: ZnS weight ratios under -18 V bias, (a) 1:1.5, (b) 1:1.25, (c) 1:1, (d) 1.25:1, (e) 1.5:1

Table S3  $\sqrt{i_n^2}$  values (A/Hz<sup>1/2</sup>) of YZ-PD with different Y-TiOPc: ZnS weight ratios at -18 V (Bold numbers represent the maximum value).

| No.                     | $\sqrt{i_n^2}$                          |
|-------------------------|-----------------------------------------|
| Y-TiOPc:ZnS(1:1.5)      | $6.4 \times 10^{-7}$                    |
| Y-TiOPc:ZnS(1:1.25)     | $1.18 \times 10^{-6}$                   |
| <b>Y-TiOPc:ZnS(1:1)</b> | <b><math>2.19 \times 10^{-7}</math></b> |
| Y-TiOPc:ZnS(1.25:1)     | $5.78 \times 10^{-6}$                   |
| Y-TiOPc:ZnS(1.5:1)      | $6.38 \times 10^{-7}$                   |

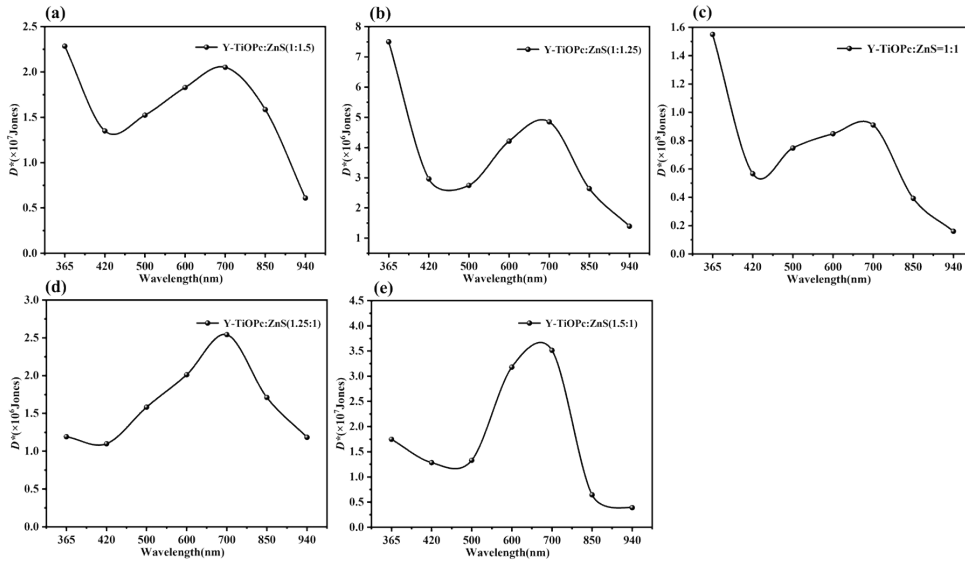

Fig. S4  $D^*$  spectra of YZ-PD with different Y-TiOPc: ZnS weight ratios under  $0.01 \text{ mW/cm}^2$  at  $-18 \text{ V}$  bias, (a)

1:1.5, (b) 1:1.25, (c) 1:1, (d) 1.25:1, (e) 1.5:1

Table S4  $D^*$  values (Jones) of YZ-PD with different Y-TiOPc: ZnS weight ratios at  $-18 \text{ V}$  and  $0.01 \text{ mW/cm}^2$  (Bold numbers represent the maximum value).

| No.                 | 365 nm                               | 420 nm                               | 500 nm                               | 600 nm                               | 700 nm                               | 850 nm                               | 940 nm                               |
|---------------------|--------------------------------------|--------------------------------------|--------------------------------------|--------------------------------------|--------------------------------------|--------------------------------------|--------------------------------------|
| Y-TiOPc:ZnS(1:1.5)  | $2.29 \times 10^7$                   | $1.35 \times 10^7$                   | $1.52 \times 10^7$                   | $1.83 \times 10^7$                   | $2.05 \times 10^7$                   | $1.59 \times 10^7$                   | $6.10 \times 10^6$                   |
| Y-TiOPc:ZnS(1:1.25) | $7.50 \times 10^6$                   | $2.96 \times 10^6$                   | $2.75 \times 10^6$                   | $4.21 \times 10^6$                   | $4.85 \times 10^6$                   | $2.64 \times 10^6$                   | $1.40 \times 10^6$                   |
| Y-TiOPc:ZnS(1:1)    | <b><math>1.55 \times 10^8</math></b> | <b><math>5.67 \times 10^7</math></b> | <b><math>7.48 \times 10^7</math></b> | <b><math>8.48 \times 10^7</math></b> | <b><math>9.10 \times 10^7</math></b> | <b><math>3.93 \times 10^7</math></b> | <b><math>1.60 \times 10^7</math></b> |
| Y-TiOPc:ZnS(1.25:1) | $1.19 \times 10^6$                   | $1.10 \times 10^6$                   | $1.58 \times 10^6$                   | $2.01 \times 10^6$                   | $2.54 \times 10^6$                   | $1.71 \times 10^6$                   | $1.18 \times 10^6$                   |
| Y-TiOPc:ZnS(1.5:1)  | $1.75 \times 10^7$                   | $1.28 \times 10^7$                   | $1.33 \times 10^7$                   | $3.18 \times 10^7$                   | $3.51 \times 10^7$                   | $6.45 \times 10^6$                   | $3.89 \times 10^6$                   |

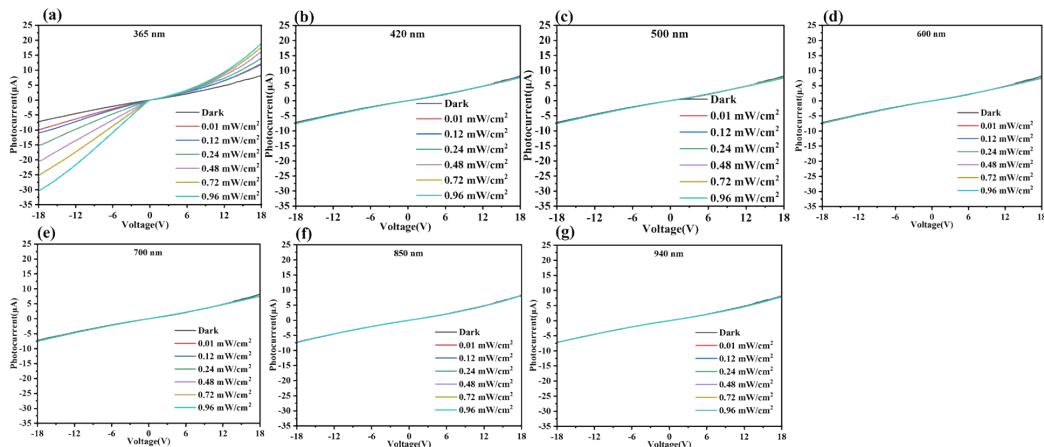

Fig. S5 The  $I$ - $V$  curves of Z-PD measured in the dark and under different exposure wavelengths: (a) 365 nm, (b) 420 nm, (c) 500 nm, (d) 600 nm, (e) 700 nm, (f) 850 nm, (g) 940 nm. The effective exposure area of the device was

$0.15 \text{ cm}^2$

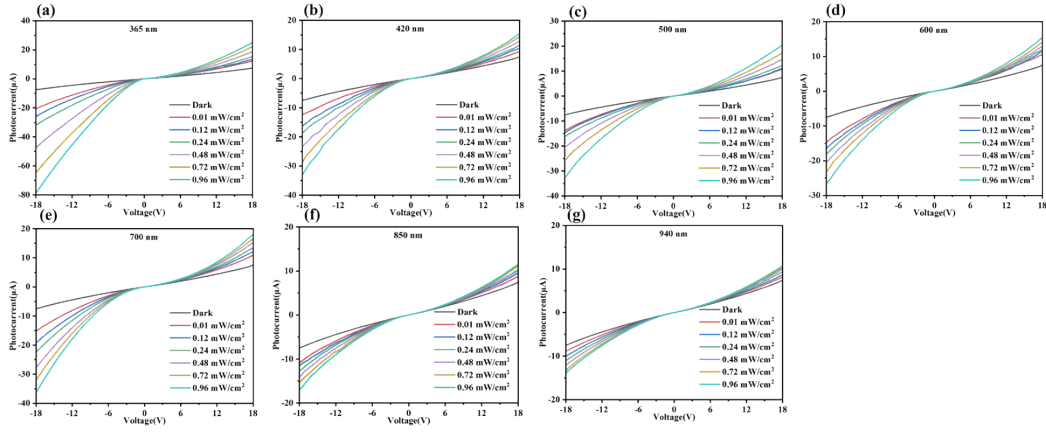

**Fig. S6** The  $I$ - $V$  curves of YZ-PD measured in the dark and under different exposure wavelengths: (a) 365 nm, (b) 420 nm, (c) 500 nm, (d) 600 nm, (e) 700 nm, (f) 850 nm, (g) 940 nm. The effective exposure area of the device was  $0.15 \text{ cm}^2$

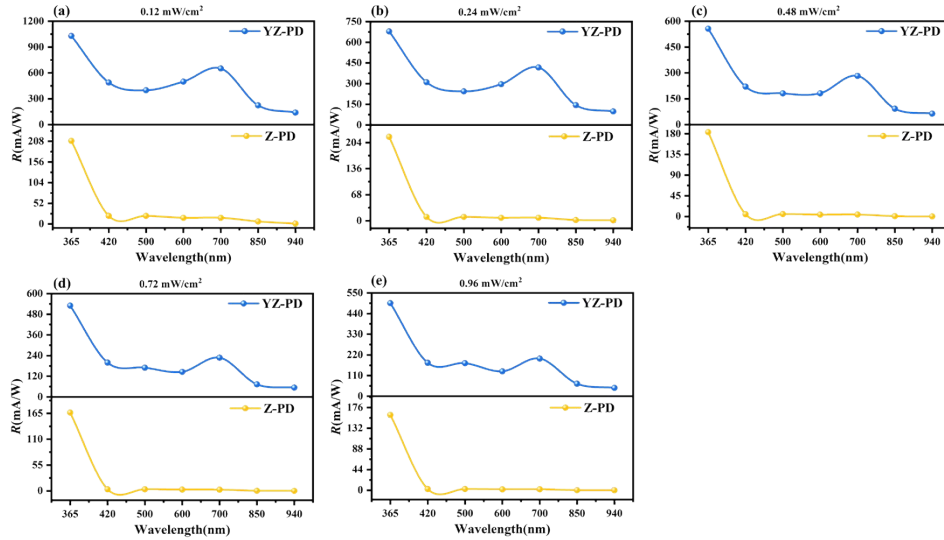

**Fig. S7**  $R$  of Z-PD and YZ-PD as a function of different wavelengths at  $-18 \text{ V}$  bias, (a)  $0.12 \text{ mW/cm}^2$ , (b)  $0.24 \text{ mW/cm}^2$ , (c)  $0.48 \text{ mW/cm}^2$ , (d)  $0.72 \text{ mW/cm}^2$ , (e)  $0.96 \text{ mW/cm}^2$ .

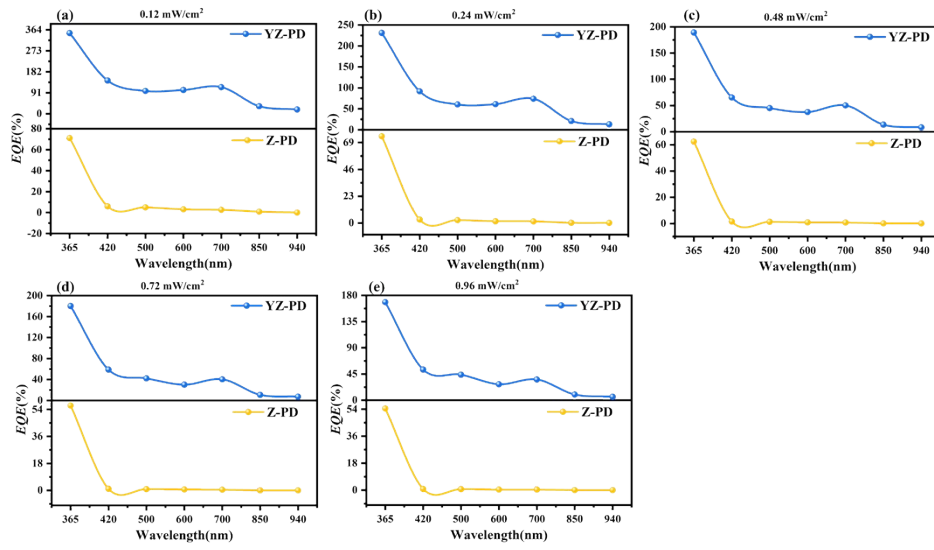

**Fig. S8** EQE of Z-PD and YZ-PD as a function of different wavelengths at -18 V bias, (a) 0.12mW/cm<sup>2</sup>, (b) 0.24 mW/cm<sup>2</sup>, (c) 0.48 mW/cm<sup>2</sup>, (d) 0.72 mW/cm<sup>2</sup>, (e) 0.96 mW/cm<sup>2</sup>.

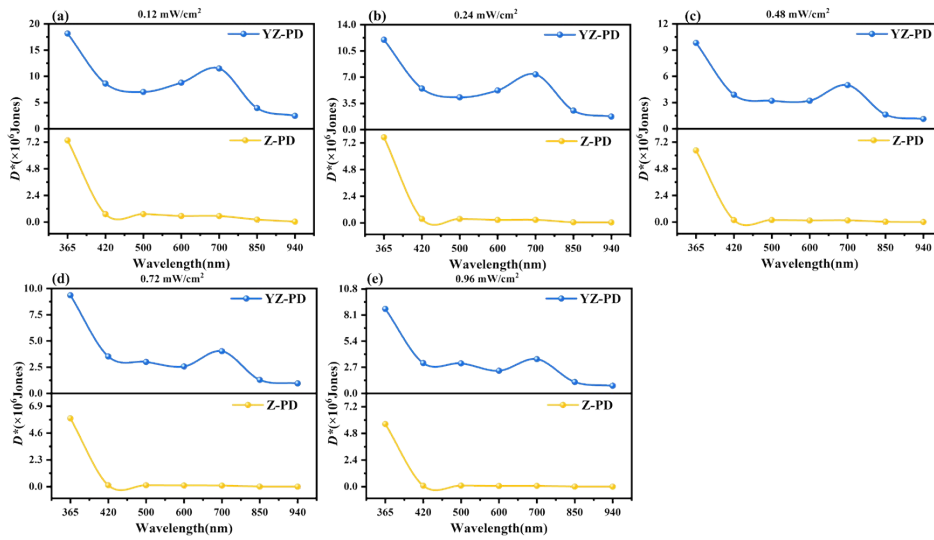

**Fig. S9** D\* of Z-PD and YZ-PD as a function of different wavelengths at -18 V bias, (a) 0.12mW/cm<sup>2</sup>, (b) 0.24 mW/cm<sup>2</sup>, (c) 0.48 mW/cm<sup>2</sup>, (d) 0.72 mW/cm<sup>2</sup>, (e) 0.96 mW/cm<sup>2</sup>.

**Table S5** R values (mW/cm<sup>2</sup>) of Z-PD and YZ-PD at -18 V and 0.01 mW/cm<sup>2</sup>.

| No.           | 365 nm  | 420 nm  | 500 nm | 600 nm | 700 nm | 850 nm  | 940 nm |
|---------------|---------|---------|--------|--------|--------|---------|--------|
| Z-PD          | 1805.33 | 244     | 252    | 196    | 190.67 | 74.67   | 11.33  |
| YZ-PD         | 8782    | 3210.67 | 4236   | 4808   | 5156   | 2225.33 | 906.67 |
| Magnification | 5       | 13      | 17     | 25     | 27     | 30      | 80     |

**Table S6** EQE values (%) of Z-PD and YZ-PD at -18 V and 0.01 mW/cm<sup>2</sup>.

| No.  | 365 nm | 420 nm | 500 nm | 600 nm | 700 nm | 850 nm | 940 nm |
|------|--------|--------|--------|--------|--------|--------|--------|
| Z-PD | 613.73 | 72.09  | 62.54  | 40.53  | 33.80  | 10.90  | 1.50   |

|                      |         |        |         |        |        |        |        |
|----------------------|---------|--------|---------|--------|--------|--------|--------|
| <b>YZ-PD</b>         | 2985.46 | 948.54 | 1051.23 | 994.31 | 913.95 | 324.85 | 119.68 |
| <b>Magnification</b> | 5       | 13     | 17      | 25     | 27     | 30     | 80     |

Table S7  $D^*$  values (Jones) of Z-PD and YZ-PD at -18 V.

| No.                  | 365 nm             | 420 nm             | 500 nm             | 600 nm             | 700 nm             | 850 nm             | 940 nm             |
|----------------------|--------------------|--------------------|--------------------|--------------------|--------------------|--------------------|--------------------|
| <b>Z-PD</b>          | $6.35 \times 10^7$ | $8.58 \times 10^6$ | $8.86 \times 10^6$ | $6.89 \times 10^6$ | $6.70 \times 10^6$ | $2.63 \times 10^6$ | $3.99 \times 10^5$ |
| <b>YZ-PD</b>         | $1.55 \times 10^8$ | $5.67 \times 10^7$ | $7.48 \times 10^7$ | $8.48 \times 10^7$ | $9.10 \times 10^7$ | $3.93 \times 10^7$ | $1.60 \times 10^7$ |
| <b>Magnification</b> | 2                  | 7                  | 8                  | 12                 | 14                 | 15                 | 40                 |

The decay curves of ZnS NRs and Y-TiOPc NPs@ ZnS NRs were studied (Fig. 3b), and the decay traces for the samples could be fitted with a double exponential function by equation S1. The average lifetime ( $\tau_{ave}$ ) of the samples can be obtained by the following equation S2, where  $A_1$ ,  $A_2$  are fractional contributions of time-resolved emission decay lifetimes  $\tau_1$ ,  $\tau_2$ .

$$y = y_0 + A_1 \exp(-x / \tau_1) + A_2 \exp(-x / \tau_2) \quad (1)$$

$$\tau_{ave} = (A_1 \tau_1^2 + A_2 \tau_2^2) / (A_1 + A_2) \quad (2)$$

Where  $\tau_1=0.63$  ns,  $\tau_2=1.92$  ns,  $A_1=0.216$ ,  $A_2=0.005$  (ZnS NRs).  $\tau_1=0.58$  ns,  $\tau_2=9.76$  ns,  $A_1=0.241$ ,  $A_2=0$  (Y-TiOPc:ZnS).
